# Supplementary material for: Hydrogel Polyester Scaffolds via Direct-Ink-Writing of Ad Hoc Designed Photocurable Macromonomer
Source: MDPI journal article supplement (doi:10.3390/polym14040711), 2022-02-12
Supplement: s1 [file s1]

**SUPPLEMENTARY INFORMATION FOR:**

# **Hydrogel Polyester Scaffolds via Direct-Ink-Writing of ad hoc Designed Photocurable Macromonomer**

**Tiziana Fuoco <sup>1,\*</sup>, Mo Chen <sup>2,\*</sup>, Shubham Jain <sup>1</sup>, Xi Vincent Wang <sup>2</sup>, Lihui Wang <sup>2</sup> and Anna Finne-Wistrand <sup>1</sup>**

<sup>1</sup> Department of Fibre and Polymer Technology, School of Engineering Sciences in Chemistry, Biotechnology and Health, KTH Royal Institute of Technology, Teknikringen, 56-58, SE 100-44 Stockholm, Sweden; shubhamj@kth.se (S.J.); annaf@kth.se (A.F.-W.)

<sup>2</sup> Department of Production Engineering, School of Industrial Engineering and Management, KTH Royal Institute of Technology, Brinellvägen 68, S E 114-28 Stockholm, Sweden; wangxi@kth.se (X.V.W.); lihuiw@kth.se (L.W.)

\* Correspondence: tiziana@kth.se (T.F.); mc3dp@outlook.com (M.C.)

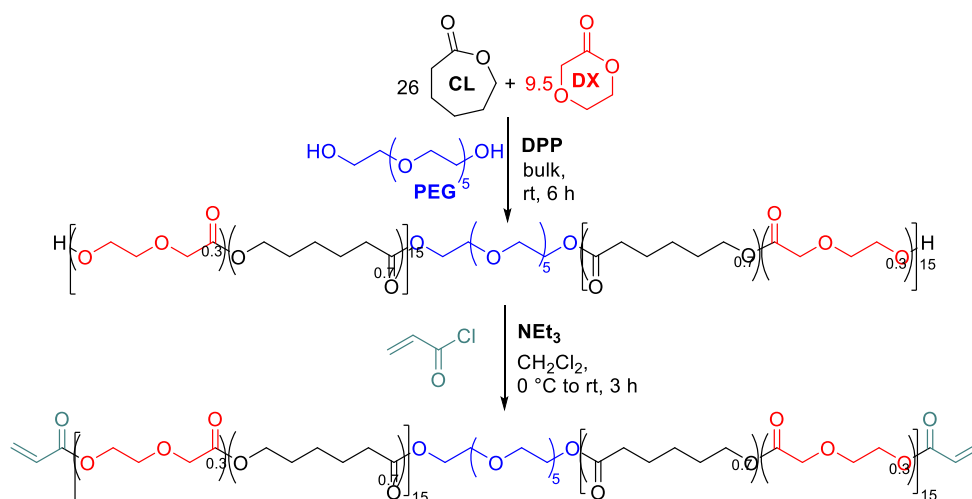

**Scheme S1.** Synthesis of the photocurable macromonomer by co-oligomerization of CL and DX using PEG as initiator and DPP as catalyst, followed by acrylation of the chain-end.

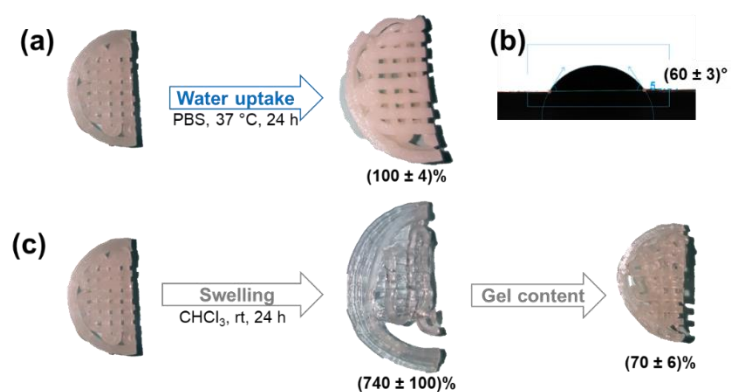

**Figure S1.** (a) Water uptake, (b) contact angle and (c) gel content of the scaffolds. Pictures are representative of different samples and not in scale.

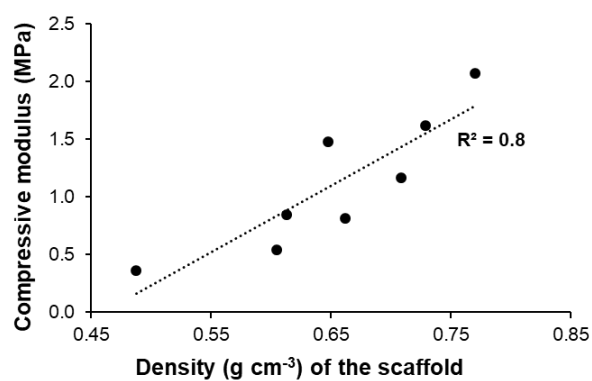

**Figure S2.** Plot of compressive modulus versus the density of the scaffolds.
